# Supplementary material
Source: publisher site journal article supplement (https://www.spandidos-publications.com/4291/downloadSupplementary)
Supplement: Supplementary file 1 [file downloadSupplementary]

## Sheet: Table S5
Table SV. Differentially expressed genes (DEGs) between the siCtrl- and siDEK-treated AGS cells.
Gene	logFC	logCPM	P-value	FDR	siCtrl_1st	siCtrl_2nd	siCtrl_3rd	siDEK_1st	siDEK_2nd	siDEK_3rd	Symbol	Chr	Gene type	Description
ENSG00000278597.1	-6.37485	1.10998	5.29612e-72	1.45908e-67	4.32	5.26	198.06	0.69	1.31	0.59	FP671120.7	chr21	miRNA	--
ENSG00000174977.8	-5.30507	-2.81971	0.000140953	0.0264167	0.1	0.05	0.15	0	0	0	AC026271.5	chr17	processed_pseudogene	--
ENSG00000201998.1	-5.22014	-2.86784	0.000140953	0.0264167	1.16	1.06	0.25	0	0	0	SNORA23	chr11	snoRNA	small nucleolar RNA, H/ACA box 23
ENSG00000167355.7	-5.00267	-2.9839	0.000542146	0.0675843	0.15	0.14	0.04	0	0	0	AC104389.28	chr11	processed_transcript	--
ENSG00000206262.8	-4.87319	-3.04934	0.00209804	0.152765	0.04	0.01	0.04	0	0	0	FOXL2NB	chr3	protein_coding	FOXL2 neighbor
ENSG00000231993.1	-4.74694	-3.11009	0.00209804	0.152765	0.23	0.35	0.1	0	0	0	EP300-AS1	chr22	antisense	EP300 antisense RNA 1
ENSG00000204710.2	-4.74667	-3.11024	0.00209804	0.152765	0.04	0.23	0.05	0	0	0	SPDYC	chr11	protein_coding	speedy/RINGO cell cycle regulator family member C
ENSG00000265559.2	-4.74111	-3.11309	0.00413682	0.225682	0	0.54	0.38	0	0	0	RN7SL652P	chr11	misc_RNA	RNA, 7SL, cytoplasmic 652, pseudogene
ENSG00000235376.5	-4.60075	-3.17719	0.00413682	0.225682	0.12	0	0.02	0	0	0	RPEL1	chr10	protein_coding	ribulose-5-phosphate-3-epimerase-like 1
ENSG00000282390.1	-4.59978	-3.17768	0.00413682	0.225682	0	0.08	0.02	0	0	0	RP11-29A19.2	chr10	sense_intronic	--
ENSG00000205129.8	-4.59462	-3.18033	0.00816945	0.309585	0.06	0.06	0.1	0	0	0	C4orf47	chr4	protein_coding	chromosome 4 open reading frame 47
ENSG00000236497.1	-4.59254	-3.1814	0.00816945	0.309585	0	0.05	0.07	0	0	0	RP11-66A2.2	chr1	lincRNA	--
ENSG00000227954.6	-4.58893	-3.18326	0.00816945	0.309585	0	0	0.03	0	0	0	TARID	chr6	antisense	TCF21 antisense RNA inducing promoter demethylation
ENSG00000256745.1	-4.44104	-3.24604	0.00816945	0.309585	0.39	0.12	0	0	0	0	RP11-680H20.1	chr11	processed_pseudogene	--
ENSG00000212125.2	-4.43712	-3.24805	0.00816945	0.309585	0.15	0.07	0.05	0	0	0	TAS2R15P	chr12	processed_pseudogene	taste receptor, type 2, member 15, pseudogene
ENSG00000272250.1	-4.43656	-3.24833	0.00816945	0.309585	0	0.38	0.09	0	0	0	RP11-346C20.4	chr16	lincRNA	--
ENSG00000260743.1	-4.43334	-3.24999	0.00816945	0.309585	0.07	0.02	0.06	0	0	0	RP11-255C15.3	chr3	lincRNA	--
ENSG00000145861.7	-3.30228	-2.81641	0.00203478	0.151919	0	0.12	0.05	0	0.01	0	C1QTNF2	chr5	protein_coding	C1q and tumor necrosis factor related protein 2
ENSG00000252835.1	-3.29886	-2.81818	0.00203478	0.151919	0.25	1.39	1.15	0	0.23	0	SCARNA21	chr17	scaRNA	small Cajal body-specific RNA 21
ENSG00000200959.1	-3.27685	-1.40135	1.09068e-10	1.1557e-07	1.96	4.23	2.07	0.34	0.16	0.29	SNORA74A	chr5	snoRNA	small nucleolar RNA, H/ACA box 74A
ENSG00000226609.1	-3.0893	-2.92554	0.00373319	0.213824	0.59	0.15	0.16	0.08	0	0	RP11-276E15.4	chr9	antisense	--
ENSG00000256139.2	-3.08413	-2.92882	0.0068247	0.292411	0.16	0.07	0.15	0	0	0.03	RP11-968O1.5	chr12	sense_overlapping	--
ENSG00000273363.1	-3.0835	-2.92852	0.0068247	0.292411	0.26	0.12	0.25	0.06	0	0	RP11-285G1.14	chr10	sense_intronic	--
ENSG00000276027.1	-3.01658	-2.11984	1.29543e-05	0.0041253	1.65	0.64	2.89	0.23	0.21	0.19	RNU12	chr22	snRNA	RNA, U12 small nuclear
ENSG00000269303.1	-2.96868	-2.98391	0.0068247	0.292411	0.31	0.23	0.08	0.06	0	0	CTD-2527I21.7	chr19	antisense	--
ENSG00000251791.1	-2.96327	-2.98669	0.0068247	0.292411	0.67	0.12	0.43	0.13	0	0	SCARNA6	chr2	scaRNA	small Cajal body-specific RNA 6
ENSG00000270722.1	-2.89062	0.818211	5.96973e-32	2.05583e-28	12.27	16.51	21.39	4.14	1.77	1.24	U1	chr1	snRNA	--
ENSG00000239002.3	-2.84061	-1.72175	3.30043e-07	0.00020206	1.07	0.78	1.59	0	0.1	0.35	SCARNA10	chr12	snoRNA	small Cajal body-specific RNA 10
ENSG00000275379.1	-2.81812	-0.928798	2.10896e-11	2.52616e-08	1.37	1.33	2.55	0.41	0.23	0.14	HIST1H3I	chr6	protein_coding	histone cluster 1, H3i
ENSG00000110244.6	-2.79093	-2.61263	0.000861149	0.0939977	0.34	0.02	0.03	0	0.02	0.02	APOA4	chr11	protein_coding	apolipoprotein A-IV
ENSG00000127252.5	-2.69774	-2.66321	0.00151756	0.134433	0.2	0.15	0.11	0.03	0.03	0	HRASLS	chr3	protein_coding	HRAS-like suppressor
ENSG00000231160.9	-2.69352	-2.66646	0.00266295	0.173723	0.07	0.02	0.06	0	0	0.02	KLF3-AS1	chr4	processed_transcript	KLF3 antisense RNA 1
ENSG00000274471.1	-2.60443	-2.7133	0.00266295	0.173723	0.24	0.11	0.15	0.04	0.04	0	RP11-228M15.1	chr15	unprocessed_pseudogene	--
ENSG00000226800.5	-2.6012	-2.71541	0.00464986	0.240796	0.09	0.03	0.1	0.02	0	0.02	CACTIN-AS1	chr19	antisense	CACTIN antisense RNA 1
ENSG00000199347.1	-2.57116	-1.53973	5.4395e-07	0.000299716	2.06	2.69	5.7	0.28	0.27	1.21	RNU5E-1	chr1	snRNA	RNA, U5E small nuclear 1
ENSG00000105131.7	-2.56754	-2.40338	0.000605845	0.0716354	0.1	0.08	0.11	0.03	0	0.01	EPHX3	chr19	protein_coding	epoxide hydrolase 3
ENSG00000168298.5	-2.56399	0.293264	4.1457e-21	9.51784e-18	2.41	2.74	3.21	0.77	0.39	0.31	HIST1H1E	chr6	protein_coding	histone cluster 1, H1e
ENSG00000132938.18	-2.51079	-2.76256	0.00464986	0.240796	0.03	0.02	0.01	0	0	0	MTUS2	chr13	protein_coding	microtubule associated tumor suppressor candidate 2
ENSG00000238622.1	-2.50621	-2.76554	0.00807308	0.309585	1.74	0	1.12	0	0	0.41	SNORD97	chr11	snoRNA	small nucleolar RNA, C/D box 97
ENSG00000272223.1	-2.50521	-2.7656	0.00807308	0.309585	0.21	0.25	0.31	0	0.06	0.06	RP1-20C7.6	chr6	antisense	--
ENSG00000202538.1	-2.49637	0.624753	9.38063e-25	2.34942e-21	15.02	15.32	19.23	3.37	1.83	3.69	RNU4-2	chr12	snRNA	RNA, U4 small nuclear 2
ENSG00000105479.15	-2.49479	-2.44661	0.00103552	0.104436	0.04	0.04	0.09	0	0.01	0.02	CCDC114	chr19	protein_coding	coiled-coil domain containing 114
ENSG00000200795.1	-2.4173	0.894889	1.05943e-26	2.91874e-23	19.77	18.06	22.3	6.25	0.91	4.31	RNU4-1	chr12	snRNA	RNA, U4 small nuclear 1
ENSG00000221676.1	-2.4044	-2.81636	0.00807308	0.309585	1.4	0.77	0.9	0	0.26	0.23	RNU6ATAC	chr9	snRNA	RNA, U6atac small nuclear (U12-dependent splicing)
ENSG00000223949.6	-2.40423	-2.81628	0.00807308	0.309585	0.05	0.03	0.03	0.01	0	0.01	ROR1-AS1	chr1	antisense	ROR1 antisense RNA 1
ENSG00000115919.14	-2.40353	-2.81635	0.00807308	0.309585	0	0.01	0.01	0	0	0	KYNU	chr2	protein_coding	kynureninase
ENSG00000124575.6	-2.3825	-1.38475	5.17663e-07	0.000291053	1.06	0.44	0.79	0.25	0.15	0.04	HIST1H1D	chr6	protein_coding	histone cluster 1, H1d
ENSG00000278249.1	-2.3369	-0.641162	2.43382e-11	2.79382e-08	2.52	2.3	1.79	0.57	0.31	0.41	SCARNA2	chr1	scaRNA	small Cajal body-specific RNA 2
ENSG00000274267.1	-2.32554	-0.437601	1.40951e-12	2.04379e-09	3.09	2.12	2.55	0.5	0.78	0.28	HIST1H3B	chr6	protein_coding	histone cluster 1, H3b
ENSG00000201321.1	-2.28978	0.395359	8.53266e-19	1.80827e-15	11.86	10.3	24.7	3.7	2.71	3.65	RNA5S9	chr1	rRNA	RNA, 5S ribosomal 9
ENSG00000239039.1	-2.27187	-2.57192	0.00501842	0.250146	2.04	1.24	1.53	0.33	0	0.56	SNORD13	chr8	snoRNA	small nucleolar RNA, C/D box 13
ENSG00000197061.4	-2.25092	-0.781101	9.46225e-10	7.89955e-07	1.79	2	1.78	0.7	0.07	0.4	HIST1H4C	chr6	protein_coding	histone cluster 1, H4c
ENSG00000274641.1	-2.22791	-1.2603	2.2954e-07	0.000150567	0.83	1.44	1.85	0.18	0	0.68	HIST1H2BO	chr6	protein_coding	histone cluster 1, H2bo
ENSG00000279801.1	-2.18955	-2.61617	0.00501842	0.250146	0.1	0.05	0.05	0	0.01	0.02	RP11-75C10.6	chr17	TEC	--
ENSG00000272610.1	-2.1883	-2.61558	0.00501842	0.250146	0.1	0.05	0.04	0.03	0.01	0	MAGI1-IT1	chr3	sense_intronic	MAGI1 intronic transcript 1
ENSG00000278356.1	-2.1874	-2.36534	0.00187	0.144929	0.31	0.35	0.6	0.22	0.07	0	RP11-372B4.3	chr12	sense_intronic	--
ENSG00000152766.5	-2.18476	-2.61741	0.00838987	0.313624	0.15	0.04	0.1	0.04	0.02	0	ANKRD22	chr10	protein_coding	ankyrin repeat domain 22
ENSG00000147246.9	-2.18127	-2.61966	0.00838987	0.313624	0.03	0.02	0.04	0.01	0	0.01	HTR2C	chrX	protein_coding	5-hydroxytryptamine (serotonin) receptor 2C, G protein-coupled
ENSG00000068985.4	-2.17882	-2.62065	0.00838987	0.313624	0.05	0.24	0.34	0.05	0.1	0	PAGE1	chrX	protein_coding	P antigen family, member 1 (prostate associated)
ENSG00000259001.3	-2.16803	3.55104	3.08746e-53	2.12649e-49	22.74	24.66	37.1	5.53	4.29	9.16	RPPH1	chr14	antisense	ribonuclease P RNA component H1
ENSG00000202198.1	-2.12668	4.82289	6.47873e-62	8.92445e-58	122.3	113.67	159.47	44.67	20.04	27.54	RN7SK	chr6	misc_RNA	RNA, 7SK small nuclear
ENSG00000184270.4	-2.12319	-1.84586	6.99032e-05	0.0156572	0.9	0.74	0.87	0.26	0.08	0.22	HIST2H2AB	chr1	protein_coding	histone cluster 2, H2ab
ENSG00000269900.3	-2.11677	4.36992	3.34771e-57	3.07432e-53	108.39	103.46	143.75	37.08	14.9	31.31	RMRP	chr9	lincRNA	RNA component of mitochondrial RNA processing endoribonuclease
ENSG00000041515.15	-2.05107	-2.44376	0.00503017	0.250146	0.03	0.02	0.03	0	0	0.01	MYO16	chr13	protein_coding	myosin XVI
ENSG00000203814.6	-2.04354	0.160793	2.07736e-14	3.17952e-11	0.57	0.67	0.64	0.2	0.14	0.13	HIST2H2BF	chr1	protein_coding	histone cluster 2, H2bf
ENSG00000197153.4	-2.01438	-1.76867	0.000270966	0.0425515	0.86	0.55	1.05	0.41	0.16	0.07	HIST1H3J	chr6	protein_coding	histone cluster 1, H3j
ENSG00000233822.4	-1.98184	-0.63697	2.91001e-09	2.2906e-06	0.15	0.15	0.17	0.01	0.04	0.07	HIST1H2BN	chr6	protein_coding	histone cluster 1, H2bn
ENSG00000054219.10	-1.97878	-2.48291	0.00503017	0.250146	0.03	0.03	0.02	0	0.01	0	LY75	chr2	protein_coding	lymphocyte antigen 75
ENSG00000274997.1	-1.94918	-1.25433	2.30381e-06	0.00103294	1.19	1.42	1.47	0.26	0.42	0.37	HIST1H2AH	chr6	protein_coding	histone cluster 1, H2ah
ENSG00000007314.11	-1.89805	-2.1455	0.00182512	0.143737	0.04	0.02	0.03	0.01	0.01	0.01	SCN4A	chr17	protein_coding	sodium channel, voltage gated, type IV alpha subunit
ENSG00000244036.3	-1.88816	-2.32789	0.00766096	0.308104	0.07	0.11	0.2	0	0.11	0	RP11-306G20.1	chr7	antisense	--
ENSG00000277157.1	-1.86905	-1.13629	2.32459e-06	0.00103294	1.58	1.65	2.19	0.22	0.62	0.65	HIST1H4D	chr6	protein_coding	histone cluster 1, H4d
ENSG00000276168.1	-1.84578	5.15646	5.01456e-49	2.30252e-45	176.94	152.79	202.07	65.44	42.53	42.39	RN7SL1	chr14	misc_RNA	RNA, 7SL, cytoplasmic 1
ENSG00000184357.4	-1.83853	0.436966	1.44049e-14	2.33444e-11	2.64	2.7	2.98	0.85	0.47	1.02	HIST1H1B	chr6	protein_coding	histone cluster 1, H1b
ENSG00000203684.5	-1.83811	-2.02272	0.0017295	0.141229	0.3	0.33	0.65	0.11	0.16	0.1	IBA57-AS1	chr1	lincRNA	IBA57 antisense RNA 1 (head to head)
ENSG00000201098.1	-1.83291	-0.621958	6.50566e-08	4.84408e-05	6.25	5.14	10.48	2.4	1.42	2.56	RNY1	chr7	misc_RNA	RNA, Ro-associated Y1
ENSG00000121552.3	-1.83277	-1.52997	6.96833e-05	0.0156572	0.36	0.23	0.32	0.1	0.05	0.11	CSTA	chr3	protein_coding	cystatin A (stefin A)
ENSG00000240859.1	-1.82646	-2.36342	0.00766096	0.308104	0.03	0.05	0.04	0.01	0	0.02	AC093627.10	chr7	lincRNA	--
ENSG00000253130.1	-1.82458	-2.3644	0.00766096	0.308104	0.1	0.21	0.21	0.06	0	0.08	CTD-3023L14.2	chr8	lincRNA	--
ENSG00000124795.14	-1.80822	6.28071	1.38782e-49	7.64686e-46	40.51	22.63	38.05	11.09	6.74	11.31	DEK	chr6	protein_coding	DEK proto-oncogene
ENSG00000280173.1	-1.79989	-2.04615	0.0017295	0.141229	0.22	0.08	0.1	0.03	0.06	0.01	RP11-447D11.3	chr3	TEC	--
ENSG00000260777.1	-1.78069	-2.21348	0.00450997	0.237571	0.18	0	0.07	0.02	0.02	0.02	CTD-2008P7.1	chr17	lincRNA	--
ENSG00000102174.8	-1.76281	-2.39842	0.00766096	0.308104	0.05	0.03	0.01	0.01	0.01	0.01	PHEX	chrX	protein_coding	phosphate regulating endopeptidase homolog, X-linked
ENSG00000274290.1	-1.73096	-0.642624	1.90115e-07	0.000130941	1.92	2.67	1.95	0.88	0.42	0.67	HIST1H2BE	chr6	protein_coding	histone cluster 1, H2be
ENSG00000183598.3	-1.73074	-1.14902	2.30642e-05	0.00641348	0.77	1.8	1.44	0.74	0.31	0.21	HIST2H3D	chr1	protein_coding	histone cluster 2, H3d
ENSG00000278771.1	-1.7187	-2.24873	0.00702041	0.295379	1.42	0.22	0.61	0.34	0	0.29	Metazoa_SRP	chr14	misc_RNA	--
ENSG00000246334.2	-1.70906	-1.95922	0.00161118	0.138634	0.11	0.27	0.24	0.1	0.07	0.02	PRR7-AS1	chr5	antisense	PRR7 antisense RNA 1
ENSG00000275530.1	-1.69959	-0.967742	1.45251e-06	0.000702046	13.87	15.54	6.92	1.82	0	8.27	FP671120.4	chr21	miRNA	--
ENSG00000270141.3	-1.68817	-1.8459	0.000976191	0.101871	0.65	0.42	0.63	0.13	0.3	0.11	TERC	chr3	lincRNA	telomerase RNA component
ENSG00000274012.1	-1.6837	4.17403	2.1596e-37	8.49957e-34	85.41	72.33	102.67	37.98	20.07	24.5	Metazoa_SRP	chr14	misc_RNA	--
ENSG00000280102.2	-1.67494	2.47767	7.3362e-27	2.24569e-23	93.53	78.18	123.59	46.21	22.13	26.77	RN7SL2	chr14	miRNA	RNA, 7SL, cytoplasmic 2
ENSG00000207445.1	-1.67274	-1.1135	2.16171e-05	0.0061397	5.32	2.65	3.9	2.32	1.1	0.4	SNORD15B	chr11	snoRNA	small nucleolar RNA, C/D box 15B
ENSG00000122367.19	-1.66885	-1.98632	0.00246418	0.168311	0.07	0.03	0.04	0.01	0	0.03	LDB3	chr10	protein_coding	LIM domain binding 3
ENSG00000278705.1	-1.65845	-0.984661	1.87773e-05	0.00538868	1.05	0.96	2.08	0.7	0.29	0.4	HIST1H4B	chr6	protein_coding	histone cluster 1, H4b
ENSG00000212232.1	-1.63745	-0.248825	2.45571e-08	1.8793e-05	3.72	3.54	6.25	2	1.36	1.22	SNORD17	chr20	snoRNA	small nucleolar RNA, C/D box 17
ENSG00000263006.6	-1.61668	-0.574255	2.52585e-07	0.000161831	0.55	0.21	0.32	0.06	0.1	0.18	ROCK1P1	chr18	transcribed_unprocessed_pseudogene	Rho-associated, coiled-coil containing protein kinase 1 pseudogene 1
ENSG00000200087.1	-1.61411	0.501959	8.00369e-12	1.05001e-08	8.65	5.22	13.4	3.16	3.79	2.41	SNORA73B	chr1	snoRNA	small nucleolar RNA, H/ACA box 73B
ENSG00000159164.9	1.60448	-1.89625	0.00148244	0.131746	0.01	0.01	0.03	0.11	0.05	0.04	SV2A	chr1	protein_coding	synaptic vesicle glycoprotein 2A
ENSG00000005961.17	1.63791	-2.1088	0.00268279	0.173908	0	0.05	0.02	0.05	0.12	0.06	ITGA2B	chr17	protein_coding	integrin, alpha 2b (platelet glycoprotein IIb of IIb/IIIa complex, antigen CD41)
ENSG00000277632.1	1.65215	-1.86844	0.000976191	0.101871	0.09	0.08	0.18	0.57	0.37	0.3	CCL3	chr17	protein_coding	chemokine (C-C motif) ligand 3
ENSG00000232692.1	1.69308	-2.20967	0.00963945	0.331747	0.05	0.05	0.01	0.08	0.12	0.12	AP001596.6	chr21	antisense	--
ENSG00000230529.1	1.69488	-1.54995	0.000106148	0.021662	0.07	0.19	0.4	0.46	0.75	1.18	CEACAMP9	chr19	unprocessed_pseudogene	carcinoembryonic antigen-related cell adhesion molecule pseudogene 9
ENSG00000023839.10	1.69613	-1.54906	6.96833e-05	0.0156572	0.02	0.01	0.03	0.05	0.07	0.09	ABCC2	chr10	protein_coding	ATP-binding cassette, sub-family C (CFTR/MRP), member 2
ENSG00000272275.1	1.69614	-2.21175	0.00963945	0.331747	0.27	0.08	0.17	0.35	0.66	0.74	RP11-791G15.2	chr2	lincRNA	--
ENSG00000258711.2	1.70069	-2.07724	0.0017295	0.141229	0.01	0.01	0.02	0.09	0.03	0.04	RP11-218E20.3	chr14	lincRNA	--
ENSG00000126562.16	1.74161	-1.12494	7.2905e-06	0.00264281	0.07	0.01	0.05	0.14	0.13	0.17	WNK4	chr17	protein_coding	WNK lysine deficient protein kinase 4
ENSG00000267727.1	1.75552	-2.04766	0.0017295	0.141229	0.15	0	0.28	0.21	0.87	0.6	CTD-2540B15.7	chr19	antisense	--
ENSG00000228903.6	1.78429	-1.78729	0.000270966	0.0425515	0.02	0.02	0.03	0.08	0.1	0.09	RASA4CP	chr7	transcribed_unprocessed_pseudogene	RAS p21 protein activator 4C, pseudogene
ENSG00000261431.1	1.8071	-2.01593	0.00110876	0.108859	0.19	0.34	0.61	1.81	0.52	2.17	RP4-616B8.4	chr20	antisense	--
ENSG00000275263.1	1.84273	-2.28342	0.00702041	0.295379	0.22	0.1	0.21	1.14	0.2	0.71	RP11-1072A3.4	chr16	lincRNA	--
ENSG00000267291.1	1.90851	-2.24868	0.00188022	0.144929	0.14	0	0.18	0.2	0.56	0.56	CTB-186G2.1	chr19	antisense	--
ENSG00000280407.2	1.91172	-1.9524	0.000283646	0.0430385	0.01	0.04	0.03	0.11	0.2	0.03	RP13-516M14.8	chr17	TEC	--
ENSG00000163810.11	1.94944	-2.40219	0.00307645	0.190072	0	0	0.03	0.04	0.06	0.08	TGM4	chr3	protein_coding	transglutaminase 4
ENSG00000273654.1	1.98809	-1.66006	2.95951e-05	0.00783986	0.04	0.06	0.07	0.25	0.3	0.15	CTB-52I2.4	chr19	transcribed_processed_pseudogene	--
ENSG00000048052.21	2.01384	-2.35896	0.0048285	0.245434	0.01	0	0	0.01	0.02	0.02	HDAC9	chr7	protein_coding	histone deacetylase 9
ENSG00000278987.1	2.02325	-2.36005	0.00113037	0.110042	0.02	0	0.04	0.19	0.04	0.07	LA16c-431H6.7	chr16	TEC	--
ENSG00000213199.7	2.03035	-2.17726	0.000715668	0.0813873	0.02	0.03	0.03	0.06	0.13	0.14	ASIC3	chr7	protein_coding	acid sensing (proton gated) ion channel 3
ENSG00000251485.1	2.08151	-2.52469	0.00816843	0.309585	0	0.12	0.03	0.17	0.16	0.33	AC068134.10	chr2	processed_pseudogene	--
ENSG00000075290.7	2.08533	-1.83978	0.00017873	0.0317985	0.1	0	0.02	0.1	0.14	0.25	WNT8B	chr10	protein_coding	wingless-type MMTV integration site family, member 8B
ENSG00000196338.12	2.0863	-1.47783	8.11417e-06	0.00282969	0.05	0.02	0.01	0.1	0.1	0.15	NLGN3	chrX	protein_coding	neuroligin 3
ENSG00000077420.15	2.16528	-2.47978	0.00307645	0.190072	0.02	0.01	0.01	0.09	0.04	0.03	APBB1IP	chr10	protein_coding	amyloid beta (A4) precursor protein-binding, family B, member 1 interacting protein
ENSG00000256673.1	2.18656	-2.71297	0.00464986	0.240796	0	0	0.17	0.42	0.24	0.43	RP11-599J14.2	chr12	unprocessed_pseudogene	--
ENSG00000229728.1	2.28297	-2.66247	0.00838987	0.313624	0	0.07	0.09	0.42	0.34	0.24	RP11-314N13.3	chr20	antisense	--
ENSG00000118514.13	2.33539	-2.17542	0.000267274	0.0425515	0	0.04	0.02	0.13	0.09	0.09	ALDH8A1	chr6	protein_coding	aldehyde dehydrogenase 8 family, member A1
ENSG00000115474.6	2.37179	-2.61415	0.00501842	0.250146	0.01	0.01	0.01	0.08	0.04	0.05	KCNJ13	chr2	protein_coding	potassium channel, inwardly rectifying subfamily J, member 13
ENSG00000184923.12	2.44436	-2.10793	9.82377e-05	0.0205034	0.02	0	0.01	0.05	0.07	0.05	NUTM2A	chr10	protein_coding	NUT family member 2A
ENSG00000273416.1	2.45528	-2.56757	0.00298212	0.187489	0	0.22	0	0.32	0.6	0.34	RP4-597N16.4	chr1	lincRNA	--
ENSG00000237254.2	2.47285	-2.86676	0.00807308	0.309585	0.08	0.07	0	0.61	0.29	0	TRBV30	chr7	TR_V_gene	T cell receptor beta variable 30 (gene/pseudogene)
ENSG00000257596.1	2.5816	-2.81583	0.00807308	0.309585	0	0.04	0.03	0.05	0.09	0.39	RP11-968A15.2	chr12	antisense	--
ENSG00000213062.4	2.58551	-2.81394	0.00807308	0.309585	0	0.04	0.03	0.22	0.14	0.1	RP1-206D15.6	chr1	lincRNA	--
ENSG00000170615.14	2.6864	-2.43891	0.000605845	0.0716354	0.02	0	0.01	0.06	0.09	0.07	SLC26A5	chr7	protein_coding	solute carrier family 26 (anion exchanger), member 5
ENSG00000281100.1	2.68987	-2.7611	0.00464986	0.240796	0.02	0	0.01	0.08	0.11	0.03	RP11-640L9.2	chr3	TEC	--
ENSG00000188687.15	2.78533	-2.71116	0.00266295	0.173723	0.01	0	0	0.03	0.02	0.03	SLC4A5	chr2	protein_coding	solute carrier family 4 (sodium bicarbonate cotransporter), member 5
ENSG00000178460.17	3.1322	-2.98396	0.0068247	0.292411	0	0.01	0	0.03	0	0.02	MCMDC2	chr8	protein_coding	minichromosome maintenance domain containing 2
ENSG00000254554.1	3.13573	-2.98408	0.0068247	0.292411	0	0	0.03	0.34	0.04	0.07	RP11-351I24.1	chr11	antisense	--
ENSG00000225964.5	3.25542	-2.92604	0.00373319	0.213824	0	0	0.02	0.21	0	0.18	NRIR	chr2	antisense	negative regulator of interferon response (non-protein coding)
ENSG00000278047.1	3.25908	-2.92427	0.00203478	0.151919	0	0	0.25	4.42	0	0	FP671120.6	chr21	miRNA	--
ENSG00000160396.8	3.47071	-2.81528	0.00110581	0.108859	0	0	0.01	0.01	0.08	0.08	HIPK4	chr19	protein_coding	homeodomain interacting protein kinase 4
ENSG00000183260.6	3.57111	-2.7611	0.000599517	0.0716354	0	0	0.01	0.11	0.09	0.03	ABHD16B	chr20	protein_coding	abhydrolase domain containing 16B
ENSG00000254695.1	4.52818	-3.24831	0.00816945	0.309585	0	0	0	0.14	0	0.37	RP11-396O20.1	chr11	lincRNA	--
ENSG00000214955.5	4.52846	-3.24818	0.00816945	0.309585	0	0	0	0.04	0.08	0.18	AP000318.2	chr21	lincRNA	--
ENSG00000273091.1	4.53025	-3.24731	0.00816945	0.309585	0	0	0	0.05	0.29	0.04	AP000255.6	chr21	lincRNA	--
ENSG00000006283.17	4.69215	-3.17732	0.00413682	0.225682	0	0	0	0.01	0.01	0.01	CACNA1G	chr17	protein_coding	calcium channel, voltage-dependent, T type, alpha 1G subunit
ENSG00000227053.1	4.69338	-3.17673	0.00413682	0.225682	0	0	0	0.33	0.24	0.14	RP11-395B7.4	chr7	antisense	--
ENSG00000173093.12	4.69383	-3.17651	0.00413682	0.225682	0	0	0	0.07	0.06	0.01	CCDC63	chr12	protein_coding	coiled-coil domain containing 63
ENSG00000228697.1	4.83973	-3.10952	0.00209804	0.152765	0	0	0	0.06	0.09	0.03	RP5-968D22.1	chr1	lincRNA	--
ENSG00000196376.10	4.84034	-3.10923	0.00209804	0.152765	0	0	0	0.03	0.03	0.01	SLC35F1	chr6	protein_coding	solute carrier family 35, member F1
ENSG00000183837.9	4.9742	-3.04452	0.00106569	0.106163	0	0	0	0.08	0.01	0.01	PNMA3	chrX	protein_coding	paraneoplastic Ma antigen 3
ENSG00000273325.1	5.09245	-2.98467	0.000542146	0.0675843	0	0	0	0.08	0.36	0.39	RP1-90G24.11	chr22	lincRNA	--
ENSG00000214940.8	5.40869	-2.81304	7.20346e-05	0.0160045	0	0	0	0	0.31	0	NPIPA8	chr16	protein_coding	nuclear pore complex interacting protein family, member A8
